# Supplementary material for: Efficacy of Digital Health Tools for a Pediatric Patient Registry: Semistructured Interviews and Interface Usability Testing With Parents and Clinicians
Source: PubMed Central journal article supplement (PMC8804961; doi:10.2196/29889), 2022-01-17

# Multimedia Appendix 1: Example of pneumonia discharge instructions on the Parent Engagement through Technology Systems mobile interface for parents

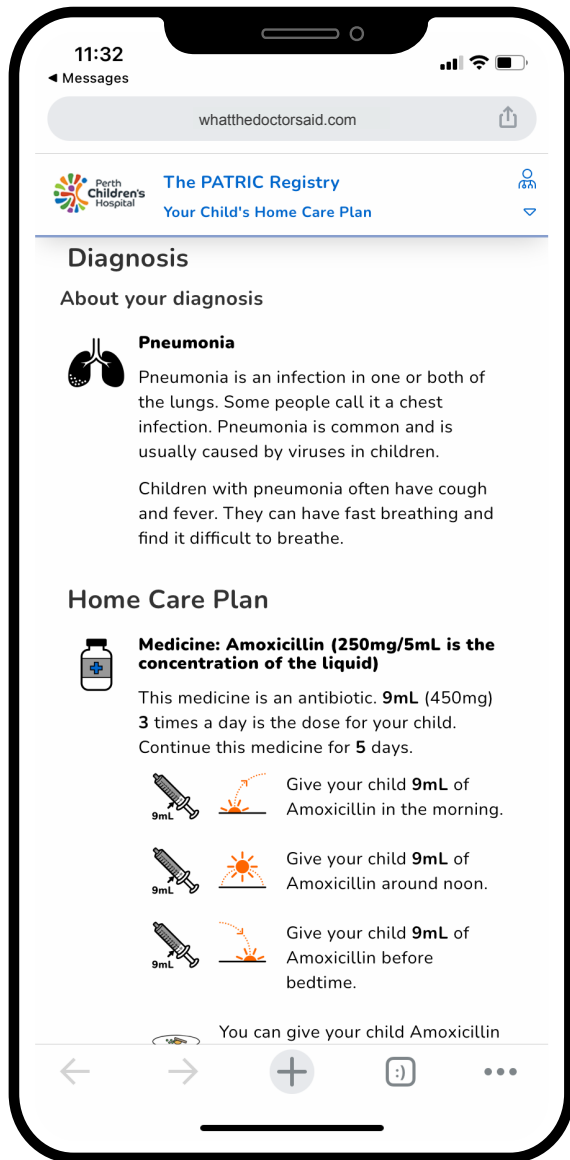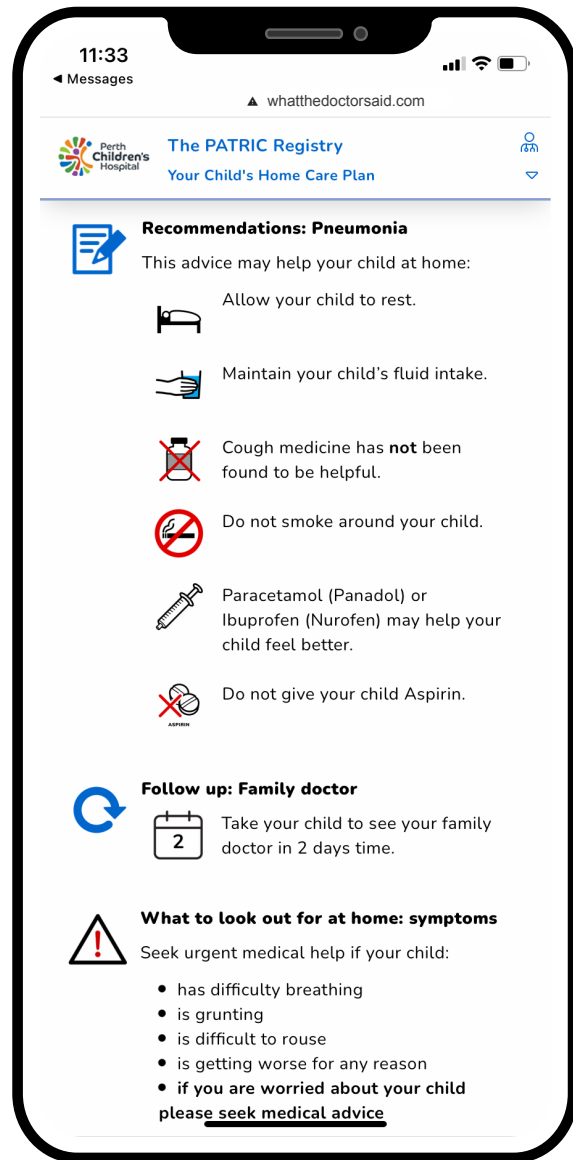

Supplement: formative_v6i1e29889_app1.pdf [file formative_v6i1e29889_app1.pdf]
