# Supplementary material for: Efficacy of Digital Health Tools for a Pediatric Patient Registry: Semistructured Interviews and Interface Usability Testing With Parents and Clinicians
Source: PubMed Central journal article supplement (PMC8804961; doi:10.2196/29889), 2022-01-17
Supplement: formative_v6i1e29889_app2.pdf [file formative_v6i1e29889_app2.pdf]

## Multimedia Appendix 2: Example of eConsent on the REDCap (Research Electronic Database Capture) mobile interface for parents

11:35

redcap.telethonkids.org.au

 **PATRIC:**  
Pragmatic Adaptive Trial for  
Respiratory Infections in Children

Resize font: 

The PATRIC Registry aims to collect information to improve the treatment of acute respiratory infections in kids. We would like you to take part. Please watch this 2 minute video to learn more.

**About PATRIC**  
from PATRIC Registry

 Our study is called PATRIC.

You can view more detailed information in the Participant Information Sheet here.

Attachment:  PATRIC PIF\_v6\_14August2020.pdf (0.33 MB)

**1) Child's First name**  
\* must provide value

11:36

redcap.telethonkids.org.au

...I have read and understand the conditions of consent described above and I agree to my child and I participating in the PATRIC Registry as described and understand that I may withdraw at any time during the project without affecting the future health care of my child.

6. I understand that I will be emailed or given a printed signed copy of this document to keep.

**Add signature** 

Signature of Parent/Guardian I agree with each of the conditions of consent listed above.



**Save signature** [reset](#)

...future, unspecified research, for which approval will be sought by a Human Research Ethics Committee.

Yes  
 No

[reset](#)

**11) Consent Date (Today's date)**  
\* must provide value

 Today D-M-Y

**Submit**
