# Supplementary material for: Efficacy of Digital Health Tools for a Pediatric Patient Registry: Semistructured Interviews and Interface Usability Testing With Parents and Clinicians
Source: PubMed Central journal article supplement (PMC8804961; doi:10.2196/29889), 2022-01-17
Supplement: formative_v6i1e29889_app4.pdf [file formative_v6i1e29889_app4.pdf]

## **Multimedia Appendix 4: Semistructured interview questions for physicians relating to discharge**

1. How do you usually provide discharge instructions to parents and carers leaving the ED?
2. What is the most frustrating thing about providing discharge instructions to parents and carers?
